# Supplementary material for: Serum Short-Chain Fatty Acids and Associations With Inflammation in Newly Diagnosed Patients With Multiple Sclerosis and Healthy Controls
Source: PubMed Central journal article supplement (PMC8134701; doi:10.3389/fimmu.2021.661493), 2021-05-06
Supplement: DataSheet_1.pdf [file DataSheet_1.pdf]

## Appendix

### Table of contents

**Table S1.** Inter- and intra-assay coefficients of variations (CVs) for SIMOA

**Table S2.** Full list of the measured metabolites

**Figure S1.** Heatmap of nominally significant correlations between SCFAs, clinical measures, biomarkers of inflammation and metabolites in MS and HCs

**Figure S2.** Scatter plots of selected correlations

**Figure S3.** Scatter plots of EDSS and the branched SCFAs

**Figure S4.** Model window of the OPLS-DA model

**Supplementary methods.** Procedure of metabolomic analyses

---

**Table S1.** Inter- and intra-assay coefficients of variations for SIMOA

|                  | <b>Inter-assay CV (%)</b> | <b>Intra-assay CV (%)</b> |
|------------------|---------------------------|---------------------------|
| <b>IL-6 low</b>  | 11.5                      | 1.4                       |
| <b>IL-6 high</b> | 15.0                      | 5.2                       |
| <b>NfL low</b>   | 13.4                      | 9.8                       |
| <b>NfL high</b>  | 4.7                       | 2.7                       |

Mean inter- and intra-assay coefficients of variations (CVs) of high and low controls of NfL and IL-6 measured by SIMOA. Data are presented in percentage (%).

NfL: neurofilament light chain, IL-6: interleukin-6

**Table S2. Full list of the measured metabolites**

| S.NO | Metabolite Name                       | S.NO | Metabolite Name                                    |
|------|---------------------------------------|------|----------------------------------------------------|
|      | <b>1. Amino acids and derivatives</b> |      | <b>8. Nucleobases</b>                              |
| 1    | 2-Aminoadipic Acid                    | 52   | Adenine (BLOQ)                                     |
| 2    | 3-OH-Anthranilic Acid                 | 53   | Cytosine (Mostly BLOQ)                             |
| 3    | 3-OH-DL-Kynurenine (BLOQ)             | 54   | Hypoxanthine                                       |
| 4    | Alanine                               | 55   | Neopterin                                          |
| 5    | 2-Aminoisobutyric acid                | 56   | Orotic acid (CC not ok)                            |
| 6    | Arginine                              | 57   | Uracil                                             |
| 7    | Asparagine                            | 58   | Xanthine                                           |
| 8    | Aspartic acid                         |      | <b>9. Neurotransmitter metabolic intermediates</b> |
| 9    | Creatine                              | 59   | GABA                                               |
| 10   | Creatinine                            | 60   | 5-Hydroxyindole-3-acetic acid                      |
| 11   | Cystathionine                         | 61   | L-5-Hydroxytryptophan                              |
| 12   | Dimethyl Glycine                      | 62   | Normetanephrine                                    |
| 13   | Glutamic Acid                         |      | <b>10. Nucleosides</b>                             |
| 14   | Glutamine                             | 63   | 2'-deoxycytidine                                   |
| 15   | Glycine                               | 64   | 2'-deoxyuridine                                    |
| 16   | Guanidinoacetic Acid                  | 65   | Adenosine                                          |
| 17   | Histidine                             | 66   | Cytidine                                           |
| 18   | Homocysteine (Mostly BLOQ)            | 67   | Guanosine                                          |
| 19   | Homogentisic acid                     | 68   | Inosine                                            |
| 20   | Homoserine (CC not ok)                | 69   | Xanthosine                                         |
| 21   | Hydroxyproline                        |      | <b>11. Organic compounds</b>                       |
| 22   | Isoleucine                            | 70   | D9 Trimethylamine-N-Oxide                          |
| 23   | Kynurenic Acid                        | 71   | 1-methylhistamine                                  |
| 24   | Kynurenine                            | 72   | Glucuronate                                        |
| 25   | Leucine                               | 73   | Hippuric acid (Mostly BLOQ)                        |
| 26   | Lysine                                |      | <b>12. Choline mtabolites/Others</b>               |
| 27   | Methionine                            | 74   | Allantoin                                          |
| 28   | Phenylalanine                         | 75   | Betaine                                            |
| 29   | Proline                               | 76   | Carnitine                                          |
| 30   | Symmetrical DiMethylArginine (SDMA)   | 77   | Carnosine                                          |
| 31   | Asymmetrical DiMethylArginine (ADMA)  | 78   | Choline                                            |
| 32   | Serine                                | 79   | Cotinine (Mostly BLOQ)                             |
| 33   | Threonine                             | 80   | Gamma-Glutamylcysteine (Mostly BLOQ)               |
| 34   | Tryptophan                            | 81   | Spermidine (BLOQ)                                  |
| 35   | Tyrosine                              |      | <b>13. Carbohydrates</b>                           |
| 36   | Valine                                | 82   | Sorbitol (PCH)                                     |
|      | <b>2. Bile Acids</b>                  | 83   | UDP-Glucose (BLOQ)                                 |
| 37   | Chenodeoxycholic Acid (Mostly ULOQ)   | 84   | Myo inositol (CC not OK)                           |

|    |                                                            |     |                                     |
|----|------------------------------------------------------------|-----|-------------------------------------|
| 38 | Cholic Acid (Mostly ULOQ)                                  | 85  | Sucrose (PCH)                       |
| 39 | Glycocholic Acid                                           |     | <b>14. Urea cycle intermediates</b> |
| 40 | Taurine                                                    | 86  | Citrulline                          |
| 41 | Taurochenodeoxycholic Acid                                 | 87  | Ornithine                           |
| 42 | Taurocholic Acid                                           |     | <b>15. Acylcarnitines</b>           |
|    | <b>3. Central Carbon Metabolites</b>                       | 88  | Acetylcarnitine                     |
| 43 | Glyceraldehyde                                             | 89  | Propionylcarnitine                  |
| 44 | Ribose-5-Phosphate                                         | 90  | Isobutyryl Carnitine                |
|    | <b>4. Cholesterol &amp; Steroid metabolicintermediates</b> | 91  | Isovaleryl Carnitine                |
| 45 | Acetoacetic acid (Ketone body)                             | 92  | Hexanoylcarnitine                   |
|    | <b>5. Nucleotides</b>                                      | 93  | Octanoylcarnitine                   |
| 46 | AMP (BLOQ)                                                 | 94  | Decanoylcarnitine                   |
| 47 | cAMP                                                       |     | <b>16. Enzyme Cofactors</b>         |
| 48 | cGMP (BLOQ)                                                | 95  | 4-Pyridoxic Acid (B6)               |
| 49 | IMP                                                        | 96  | Folic Acid (B9) (Mostly BLOQ)       |
|    | <b>6. TCA cycle intermediates</b>                          | 97  | Glutathione (reduced) (Mostly BLOQ) |
| 50 | Succinate                                                  | 98  | NAD (BLOQ)                          |
|    | <b>7. Ethanolamines</b>                                    | 99  | Niacinamide (B3)                    |
| 51 | Phosphoethanolamine                                        | 100 | Nicotinic Acid (B3) (BLOQ)          |
|    |                                                            | 101 | Pantothenic Acid (B5)               |
|    |                                                            | 102 | Pyridoxine (B6) (BLOQ)              |

Full list of the measured metabolites. BLOQ; below limit of quantification, CC not ok: calibration curve not ok, ULOQ; upper limit of quantification, PCH; poor chromatography, Mostly BLOQ or mostly ULOQ means only few samples had concentrations within calibration range, and therefore these metabolites were excluded from analyses. S.NO: sample number

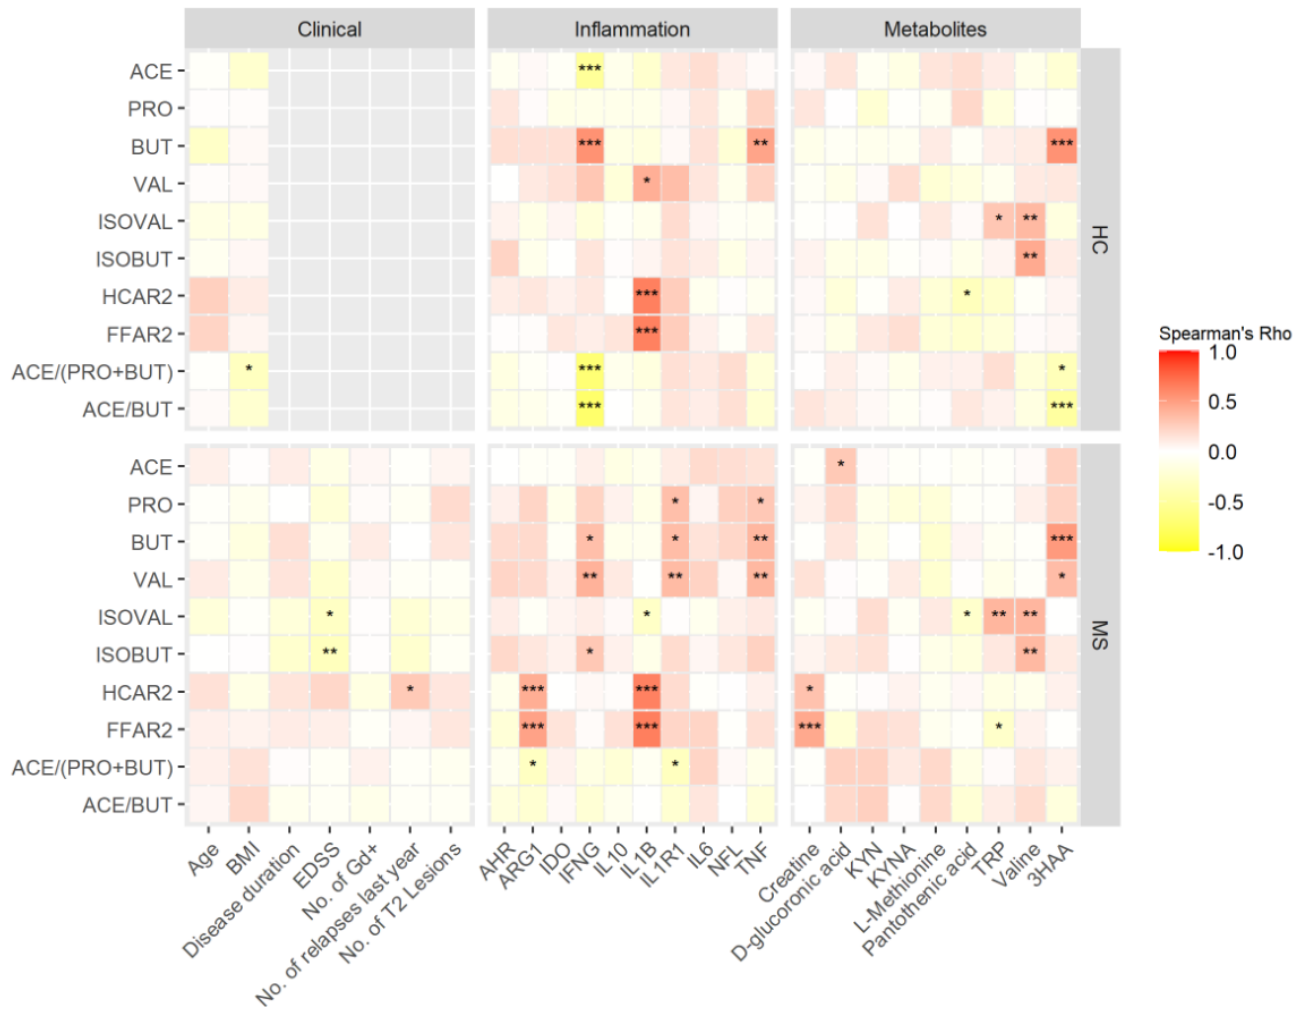

**Figure S1.** Unadjusted Spearman's correlation heatmap of the associations between SCFAs, clinical variables, biomarkers of inflammation and selected metabolites in patients with MS and HCs. Color gradients indicate rho-values; positive correlations are marked in red, negative in yellow. Clinical measures that were not applicable for HCs are in grey. P-values are not adjusted for multiple testing in this plot. \* $p < 0.05$ , \*\* $p < 0.01$  and \*\*\* $p < 0.001$ . ACE: acetate, PRO: propionate, BUT: butyrate, VAL: valerate, IVAL: isovalerate, IBUT: isobutyrate. HCAR2; hydroxycarboxylic acid receptor 2, FFAR2; free fatty acid receptor 2, BMI; body mass index, EDSS; expanded disability status scale, No. of Gd+; number of gadolinium enhancing lesions, AHR; aryl hydrocarbon receptor

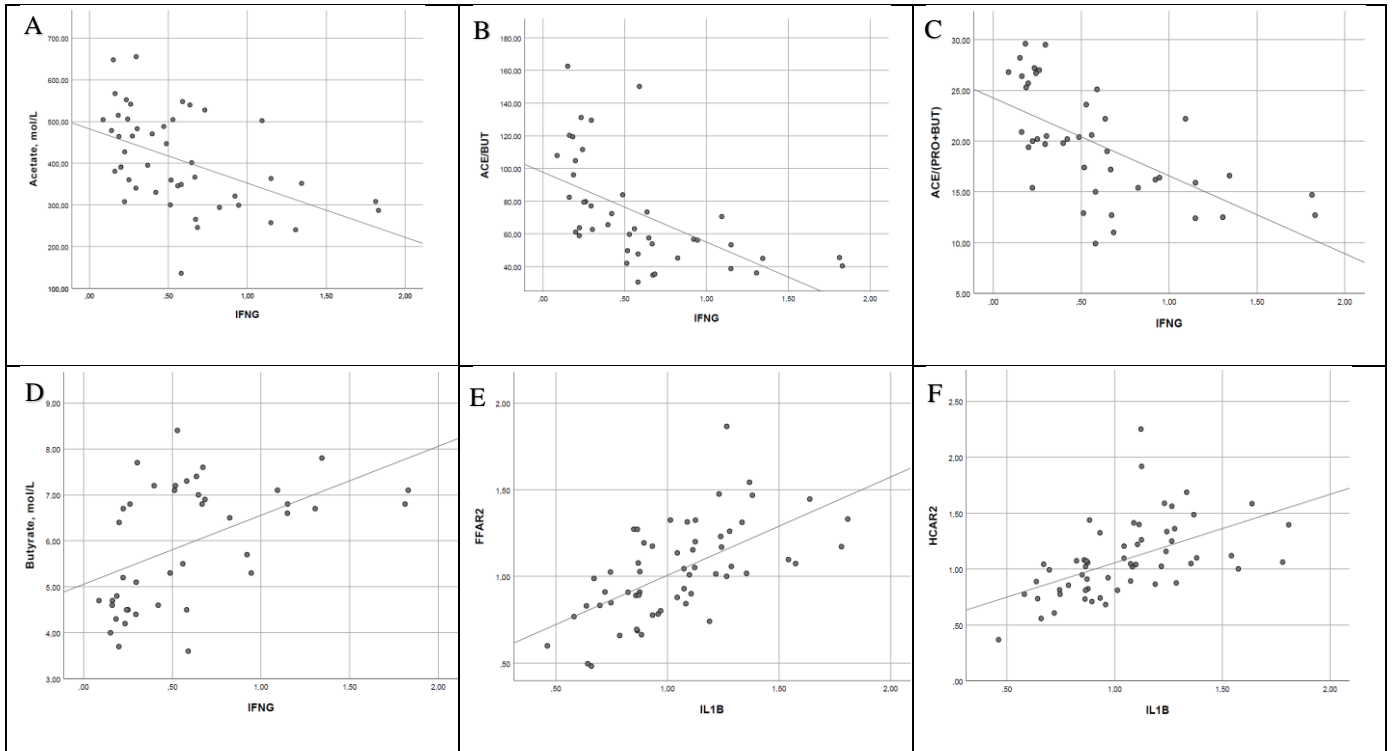

**Figure S2.** Scatter plots of selected correlations with  $q < 0.01$  and rho-values stronger than  $\pm 0.5$ .

A) Acetate and *IFNG* in HCs ( $\rho = -0.524$ ,  $q < 0.01$ ). B) Acetate/butyrate and *IFNG* in HCs ( $\rho = -0.689$ ,  $q < 0.001$ )  
 C) acetate/(propionate + butyrate) and *IFNG* in HCs ( $\rho = -0.735$ ,  $q < 0.001$ ). D) Butyrate and *IFNG* in HCs ( $\rho = 0.559$ ,  $q < 0.001$ ). E) FFAR2 and *IL1B* in MS patients ( $\rho = 0.638$ ,  $q < 0.0001$ ). F) HCAR2 and *IL1B* in MS patients ( $\rho = 0.647$ ,  $q < 0.0001$ ). Abbreviations: *IFNG*: Interferon-gamma, ACE: Acetate, BUT: Butyrate, PRO: Propionate, FFAR2: Free fatty acid receptor 2, HCAR2: hydroxycarboxylic acid receptor 2

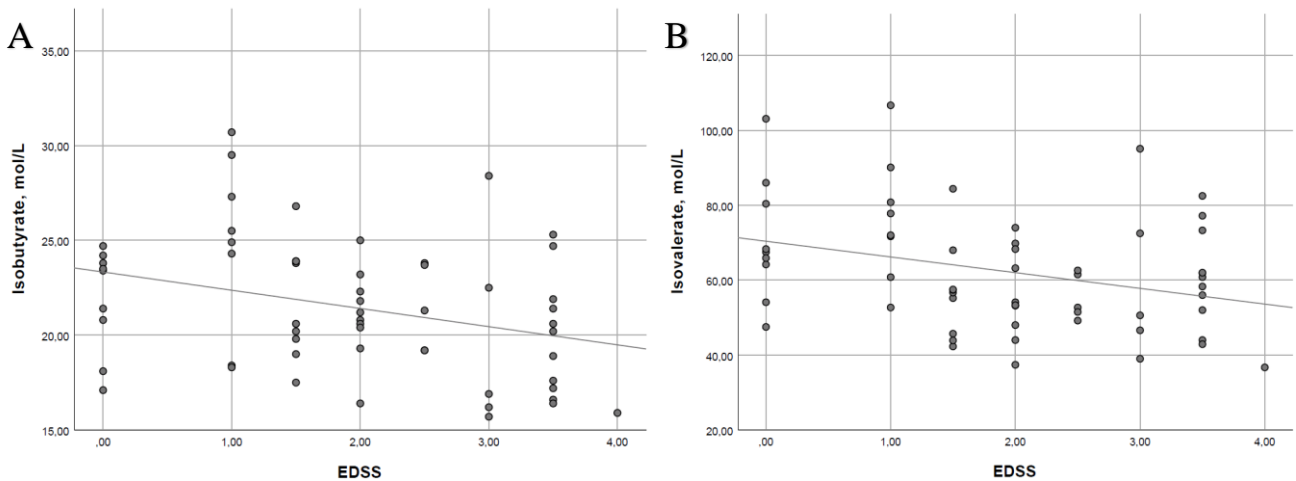

**Figure S3.** Scatter plots of clinical disability assessed by EDSS and the branched SCFAs. A) Isobutyrate and EDSS ( $\rho = -0.341$ ,  $p = 0.009$ ). B) Isovalerate and EDSS ( $\rho = -0.308$ ,  $p = 0.019$ ). EDSS: Expanded Disability Status Scale

| Component                | R2X    | R2X(cum) | Eigenvalue | R2    | R2(cum) | Q2    | Limit | Q2(cum) | R2Y | R2Y(cum) | EigenvalueY | Significance |
|--------------------------|--------|----------|------------|-------|---------|-------|-------|---------|-----|----------|-------------|--------------|
| Model                    |        | 0.118    |            |       | 0.614   |       |       | 0.221   |     | 1        |             |              |
| ▣ Predictive             |        | 0.0341   |            |       | 0.614   |       |       | 0.221   |     | 1        |             |              |
| └ P1                     | 0.0341 | 0.0341   | 3.69       | 0.614 | 0.614   | 0.221 | 0.01  | 0.221   | 1   | 1        | 2           | R1           |
| ▣ Orthogonal in X(OPL... |        | 0.0839   |            |       | 0       |       |       |         |     |          |             |              |
| └ O1                     | 0.0839 | 0.0839   | 9.06       | 0     | 0       |       |       |         |     |          |             | R1           |

Figure S4. Model window of the OPLS-DA model

## Supplementary methods

### Procedure of metabolomic analyses

Mass spectrometry-based methods were used to assess targeted metabolites at FIMM Metabolomics Unit, Institute for Molecular Medicine Finland. The final analysis for all metabolites were performed on an ACQUITY UPLC-MS/MS system (Waters Corporation, Milford, MA, USA).

Chromatographic separation was done using  $2.1 \times 100$  mm Acquity 1.7 $\mu$ m BEH amide HILIC column (Waters Corporation, Milford, MA, USA), and temperature was maintained at 45°C. The total run time is 17.5 min including 2.5 min of equilibration step at a flow rate of 600  $\mu$ L/min. Initially the gradient started with a 2.5 min isocratic step at 100% mobile phase B (ACN/ H<sub>2</sub>O, 90/10 (v/v), 20 mM ammonium formate, pH at 3), and then rising to 100% mobile phase A (ACN/H<sub>2</sub>O, 50/50 (v/v), 20 mM ammonium formate, pH at 3) over the next 10 min and maintained for 2min at 100% A and finally equilibrated to the initial conditions for 2.5 min. An injection volume of 5  $\mu$ L of sample extract was used and two cycles of 300  $\mu$ L of strong wash (methanol/isopropanol/ACN/H<sub>2</sub>O, 25/25/25/25, 0.5% FA) and 900  $\mu$ L of weak wash (methanol/isopropanol/ACN/H<sub>2</sub>O, 25/25/25/25, 0.5% ammonium hydroxide) and in addition 2 min of seal wash (90/10, methanol/H<sub>2</sub>O) were carried out. The auto-sampler was used to perform partial loop with needle overfill injections for the samples and standards and kept at 5 °C. The detection system, a Xevo® TQ-S tandem triple quadrupole mass spectrometer (Waters, Milford, MA, USA), was operated in both positive and negative polarities with a polarity switching time of 20 msec. Electro spray ionization (ESI) was chosen as the ionization mode with a capillary voltage at 0.72 and 3.70 KV in positive and negative polarities respectively. The source temperature and desolvation temperature of 150°C and 650°C, respectively, were maintained constantly throughout the experiment. Cone voltage and collision energy (CE) were

optimized for each compound. High pure nitrogen and argon gas were used as desolvation gas (600 L/hr) and collision gas (0.15 ml/min), respectively. Multiple Reaction Monitoring (MRM) acquisition mode was selected for quantification of metabolites with individual span time of 0.1 sec given in their individual MRM channels. The dwell time was calculated automatically by the software based on the region of the retention time window, number of MRM functions and the number of data points required to form the peak. MassLynx 4.1 software was used for data acquisition, data handling and instrument control. Data processing was done using TargetLynx software and metabolites were quantified by using labeled internal standards and external calibration curves.
